# Supplementary material for: Experimental confirmation of the Badger–Bauer rule in the protonated methanol clusters: weak hydrogen bond formation as a measure of terminal OH acidity in hydrogen bond networks
Source: Royal Society of Chemistry journal article supplement (doi:10.1039/d3cp04644c), 2023-01-01
Supplement: d3cp04644c1.pdf [file d3cp04644c1.pdf]

**Electronic Supplementary Information for**

**Experimental confirmation of the Badger-Bauer rule in the protonated methanol clusters**

Takeru Kato and Asuka Fujii\*

Department of Chemistry, Graduate School of Science, Tohoku University  
Sendai 980-8578, Japan

\* To whom correspondence addressed. E-mail: [asuka.fujii.c5@tohoku.ac.jp](mailto:asuka.fujii.c5@tohoku.ac.jp)

**Contents**

**Figure S1** Infrared spectra of  $\text{H}^+(\text{MeOH})_n$ -benzene ( $n = 2 - 7$ ).

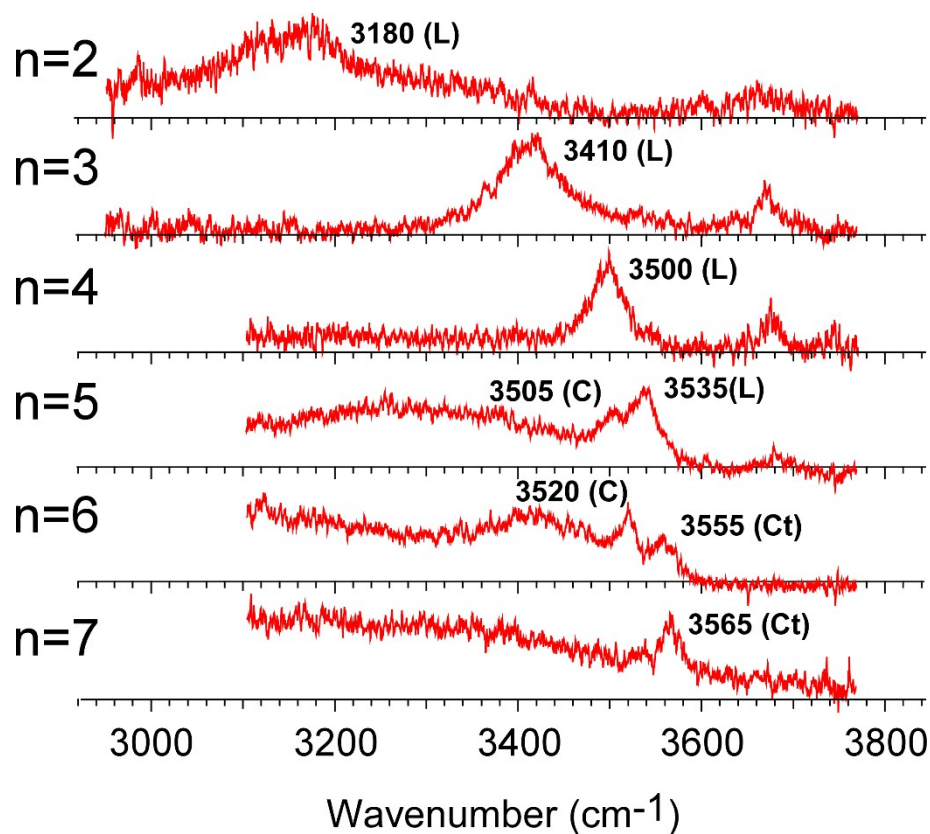

**Figure S1** Infrared spectra of  $\text{H}^+(\text{MeOH})_n$ -benzene ( $n = 2 - 7$ ) in the gas phase. Numbers in the figure are frequencies of the  $\pi$ -hydrogen bonded OH stretch bands. Isomer types of the spectral carriers are shown in parentheses. All data are taken from Ref. S1.

#### Reference

S1. T. Kato and A. Fujii, How Many Methanol Molecules Effectively Solvate an Excess Proton in the Gas Phase? Infrared Spectroscopy of  $\text{H}^+(\text{Methanol})_n$ -Benzene Clusters, *Phys. Chem. Chem. Phys.*, 2022, **24**, 163-171.
